### Erratum

#### **Reversal of Neuromuscular Blockade by Sugammadex after Continuous Infusion of Rocuronium in Patients Randomized to Sevoflurane or Propofol Maintenance Anesthesia: Erratum**

The authors of the article beginning on page 30 in the July 2009 issue wish to add the following ClinicalTrials.gov identifier to their article: NCT00559468.

#### **Reference**

Rex C, Wagner S, Spies C, Scholz J, Rietbergen H, Heeringa M, Wulf H: Reversal of neuromuscular blockade by sugammadex after continuous infusion of rocuronium in patients randomized to sevoflurane or propofol maintenance anesthesia. *ANESTHESIOLOGY* 2009; 111:30–5

### Erratum

#### **Efficacy, Safety, and Pharmacokinetics of Sugammadex for the Reversal of Rocuronium-induced Neuromuscular Blockade in Elderly Patients: Erratum**

The authors of the article beginning on page 318 in the February 2011 issue wish to add the following ClinicalTrials.gov identifier to their article: NCT00474617.

#### **Reference**

McDonagh DL, Benedict PE, Kovac AL, Drover DR, Brister NW, Morte JB, Monk TG: Efficacy, safety, and pharmacokinetics of sugammadex for the reversal of rocuronium-induced neuromuscular blockade in elderly patients. *ANESTHESIOLOGY* 2011; 114:318–29

### Erratum

#### **Reversal of Rocuronium-induced Neuromuscular Blockade with Sugammadex in Pediatric and Adult Surgical Patients: Erratum**

The authors of the article beginning on page 284 in the February 2009 issue wish to add the following ClinicalTrials.gov identifier to their article: NCT00421148.

#### **Reference**

Plaud B, Meretoja O, Hofmockel R, Raft J, Stoddart PA, van Kuijk JH, Hermens Y, Mirakhur RK: Reversal of rocuronium-induced neuromuscular blockade with sugammadex in pediatric and adult surgical patients. *ANESTHESIOLOGY* 2009; 110:284–94

### Erratum

#### **Cerebral Autoregulation-oriented Therapy at the Bedside: A Comprehensive Review: Erratum**

In the June 2017 issue, for the article beginning on page 1187, the authors wish to add that this paper was funded in part by a grant from the National Institutes of Health (Bethesda, Maryland; grant Number R01HL092259 to Dr. Charles W. Hogue, M.D.). Dr. Hogue provided mentorship on this project, including the writing of the manuscript, but recused authorship.

#### **Reference**

Rivera-Lara L, Zorrilla-Vaca A, Geocadin RG, Healy RJ, Ziai W, Mirski MA: Cerebral autoregulation-oriented therapy at the bedside: A comprehensive review. *ANESTHESIOLOGY* 2017; 126:1187–99
